# Supplementary material for: Vertical Bridgman growth and optical properties of CdSiP2 crystals
Source: Royal Society of Chemistry journal article supplement (doi:10.1039/c3ce27003c), 2013-01-01
Supplement: c3ce27003c.pdf [file c3ce27003c.pdf]

**Supporting Information:**

**Vertical Bridgman Growth and Optical Properties of CdSiP<sub>2</sub> Crystals**

**Guodong Zhang, Huapeng Ruan, Xiang Zhang, Shanpeng Wang, Xutang Tao\***

State Key Laboratory of Crystal Materials, Shandong University, Jinan 250100, P. R. China

[txt@icm.sdu.edu.cn](mailto:txt@icm.sdu.edu.cn)

Fig.1S. Photograph of Polycrystalline CSP synthesized using the single-temperature zone furnace.

Fig.2S. Powder X-ray diffraction spectra for the products reacted at different temperature.

Fig.3S. High-resolution X-ray diffraction spectrum on the (004)-faced plate of CSP crystal.

Fig.4S. Comparison of EDS components analysis between the inclusions and the CSP crystal.

Fig.5S. Polarized transmission spectra of CSP for *o*- and *e*- light.

Fig.6S. Comparison of refractive index between our fitted results and the results reported in Ref. 25

Fig.7S. Comparison of phase matching curves between our results and the results reported in Ref. 25

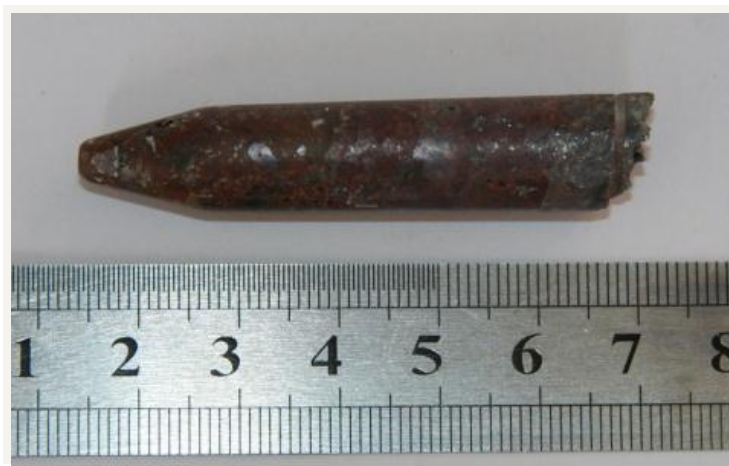

Fig. 1S Polycrystalline CSP synthesized using the single-temperature zone furnace

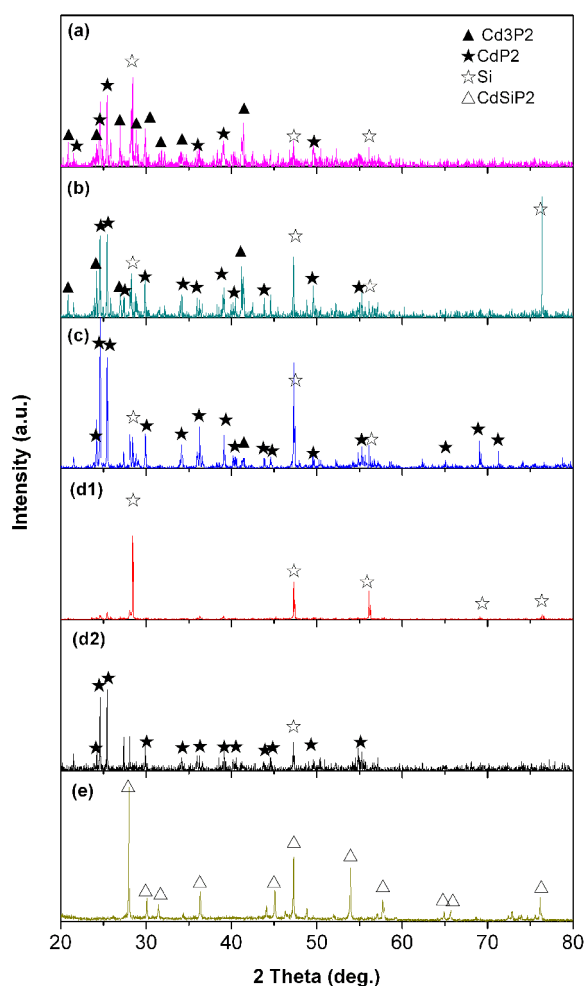

Fig. 2S Powder X-ray diffraction spectra for the products reacted at different temperature: (a) 500 °C, (b) 650 °C, (c) 700 °C, (d1) 780 °C (products at the top of the amp), (d2) 780 °C (products at the bottom of the amp) (e) 1050 °C.

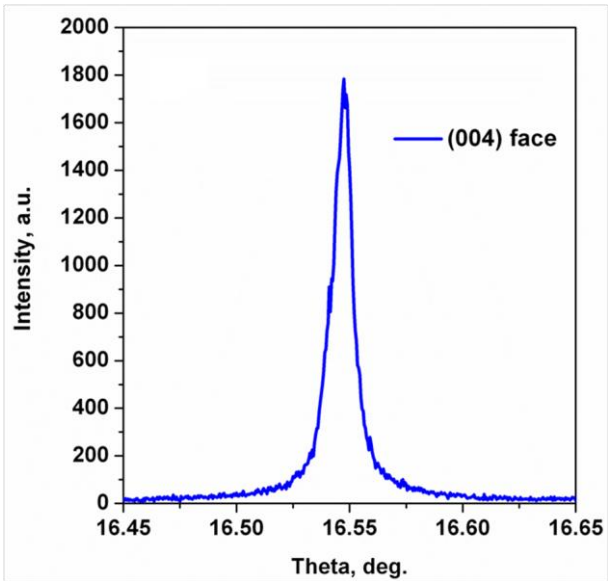

Fig.3S. High-resolution X-ray diffraction spectrum on the (004)-faced plate of CSP crystal.

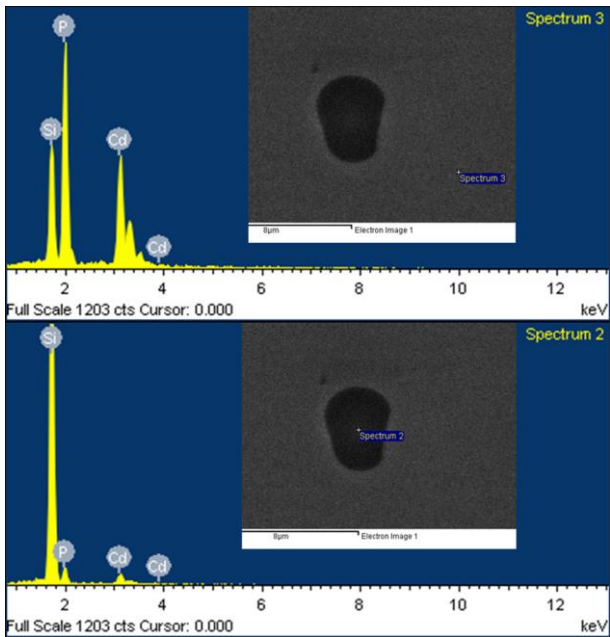

| Element | Weight% | Atomic% |
|---------|---------|---------|
| Si      | 13.02   | 23.30   |
| P       | 32.17   | 52.19   |
| Cd      | 54.81   | 24.51   |
| Totals  | 100.00  | 100     |

| Element | Weight% | Atomic% |
|---------|---------|---------|
| Si      | 84.48   | 91.61   |
| P       | 5.78    | 5.77    |
| Cd      | 9.66    | 2.62    |
| Totals  | 100.00  | 100.00  |

Fig. 4S Comparison of EDS components analysis between the inclusions and the CSP crystal. The inset shows the micro-photograph of one inclusion and the position of the measurement.

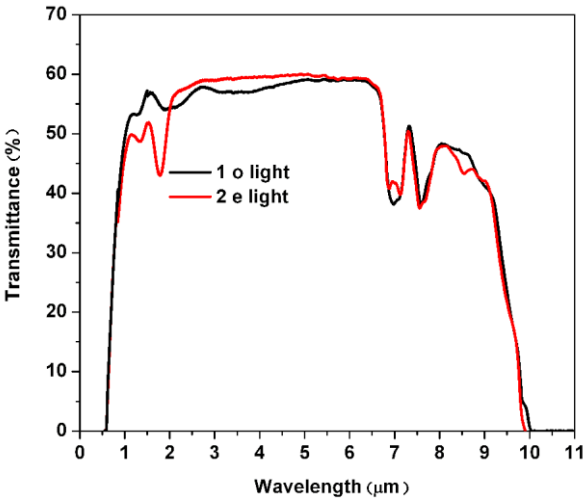

Fig. 5S Polarized transmission spectra for *o*- and *e*- light.

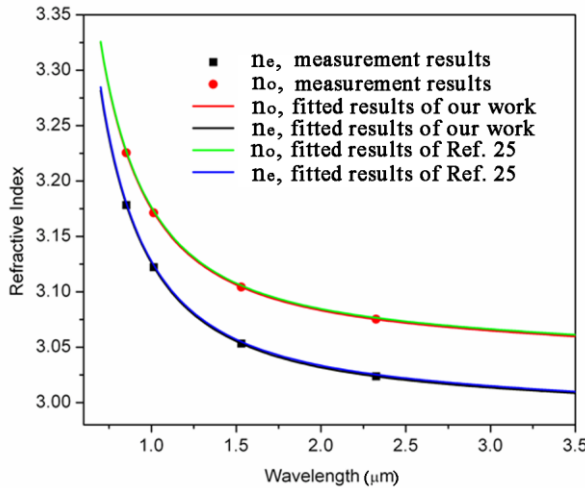

Fig. 6S Comparison of refractive index between our fitted results and the results reported in Ref. 25

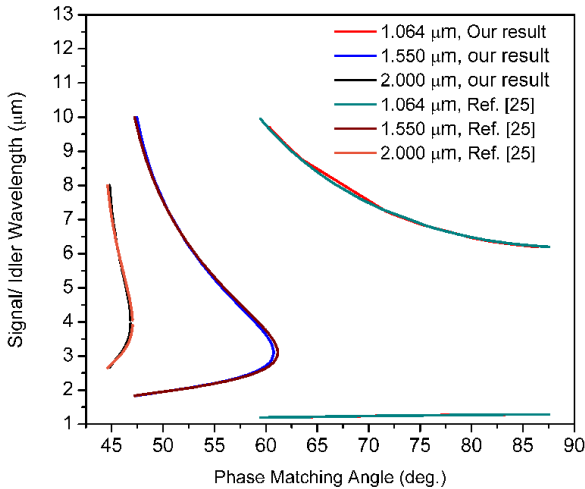

Fig. 7S Comparison of phase matching curves between our results and the results reported in Ref. 25
